# Supplementary material for: Phase transitions in bismuth-modified silver niobate ceramics for high power energy storage
Source: Royal Society of Chemistry journal article supplement (doi:10.1039/c7ta03821f), 2017-01-01
Supplement: c7ta03821f1.pdf [file c7ta03821f1.pdf]

## Supplementary Information

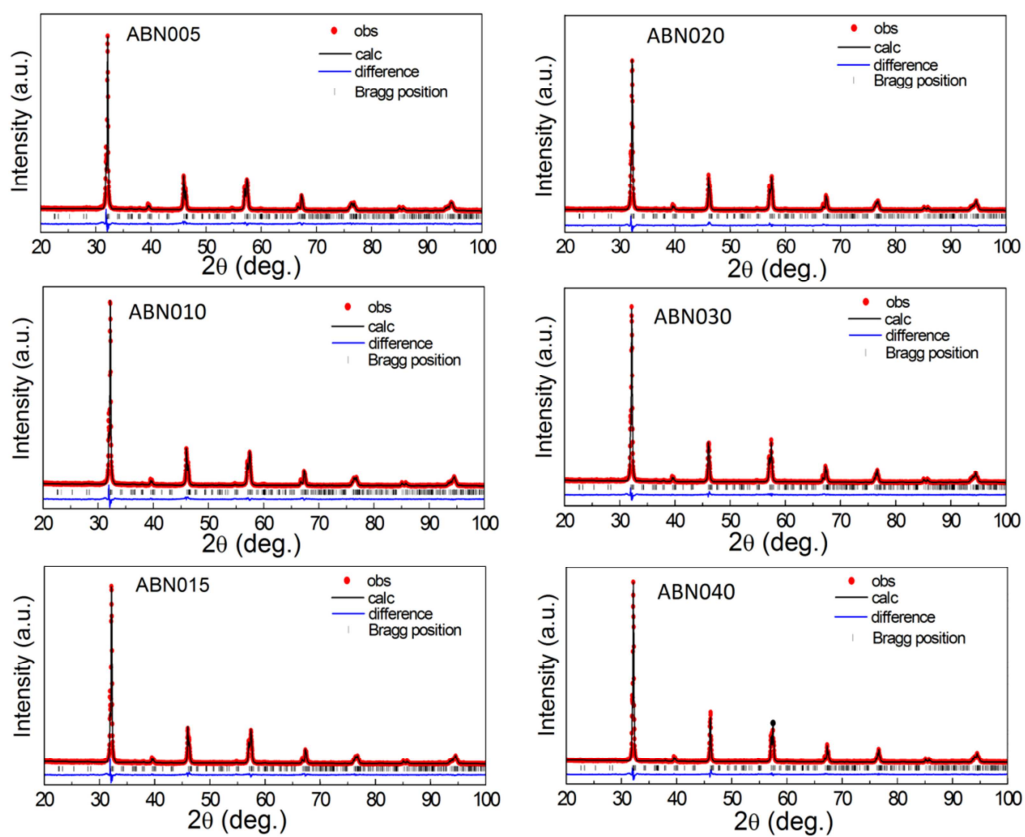

Fig. S1. Fitted X-ray diffraction profiles for crushed ABN<sub>x</sub> ceramic powders.

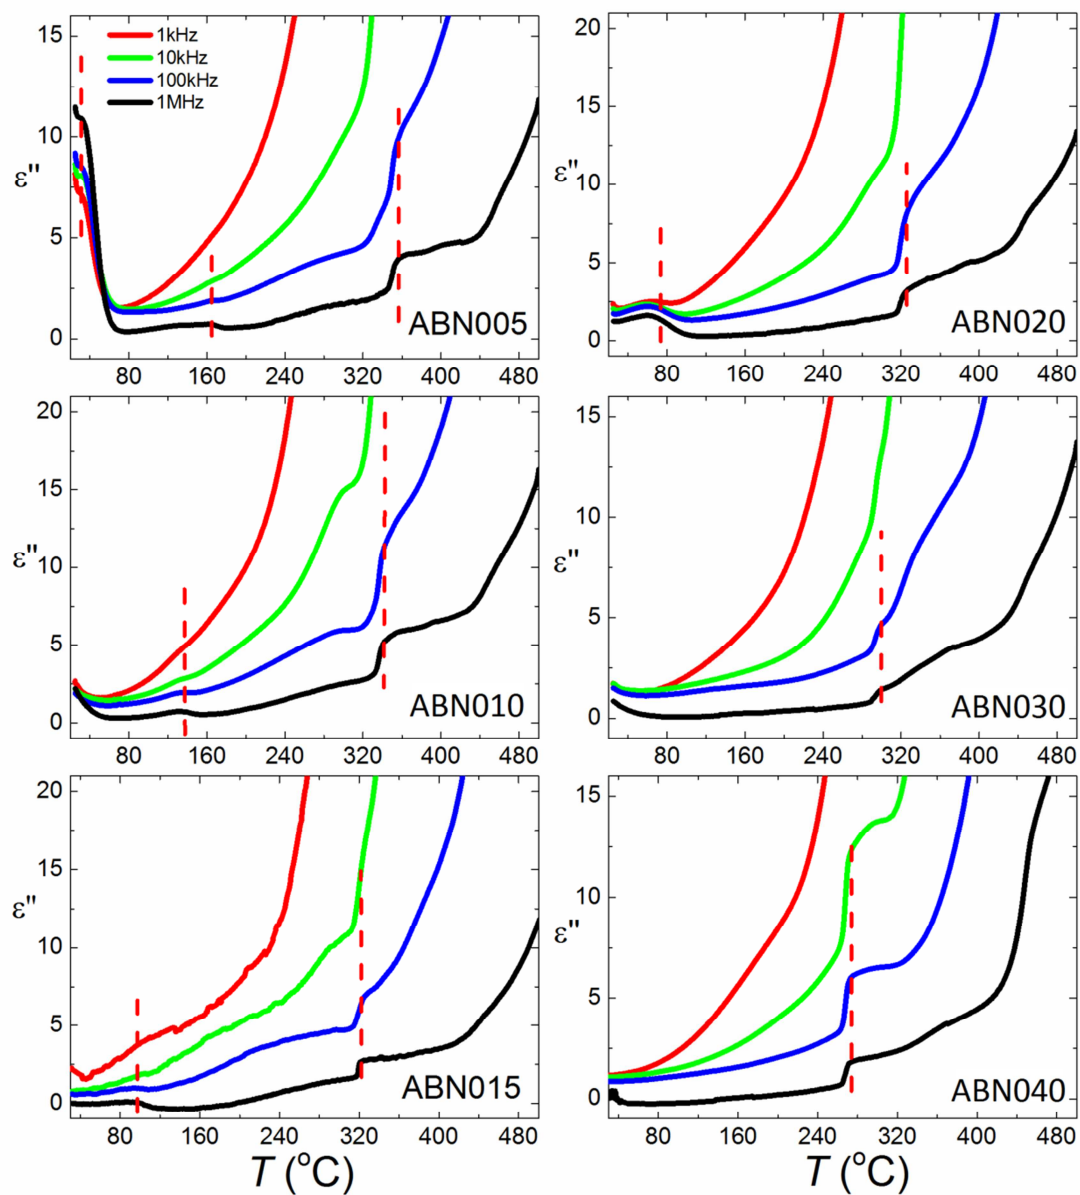

Fig. S2. Temperature dependence on heating of imaginary ( $\epsilon''$ ) part of dielectric permittivity in ABN $x$  ceramics.

Table S1: Crystal and Refinement parameters for  $\text{Ag}_{1-3x}\text{Bi}_x\text{NbO}_3$ . Estimated standard deviations are given in parentheses.

| Chemical formula           | $\text{Ag}_{0.985}\text{Bi}_{0.005}\text{NbO}_3$                                                             | $\text{Ag}_{0.97}\text{Bi}_{0.01}\text{NbO}_3$                                                               | $\text{Ag}_{0.955}\text{Bi}_{0.015}\text{NbO}_3$                                                             | $\text{Ag}_{0.94}\text{Bi}_{0.02}\text{NbO}_3$                                                               | $\text{Ag}_{0.91}\text{Bi}_{0.03}\text{NbO}_3$                                                               | $\text{Ag}_{0.88}\text{Bi}_{0.04}\text{NbO}_3$                                                               |
|----------------------------|--------------------------------------------------------------------------------------------------------------|--------------------------------------------------------------------------------------------------------------|--------------------------------------------------------------------------------------------------------------|--------------------------------------------------------------------------------------------------------------|--------------------------------------------------------------------------------------------------------------|--------------------------------------------------------------------------------------------------------------|
| Formula weight             | 248.20 g mol <sup>-1</sup>                                                                                   | 257.62 g mol <sup>-1</sup>                                                                                   | 247.05 g mol <sup>-1</sup>                                                                                   | 246.48 g mol <sup>-1</sup>                                                                                   | 245.33 g mol <sup>-1</sup>                                                                                   | 244.19 g mol <sup>-1</sup>                                                                                   |
| Crystal system             | Orthorhombic                                                                                                 | Orthorhombic                                                                                                 | Orthorhombic                                                                                                 | Orthorhombic                                                                                                 | Orthorhombic                                                                                                 | Orthorhombic                                                                                                 |
| Space group                | <i>Pbcm</i>                                                                                                  | <i>Pbcm</i>                                                                                                  | <i>Pbcm</i>                                                                                                  | <i>Pbcm</i>                                                                                                  | <i>Pbcm</i>                                                                                                  | <i>Pbcm</i>                                                                                                  |
| Unit cell dimensions       | $a = 5.5502(2) \text{ \AA}$<br>$b = 5.6059(2) \text{ \AA}$<br>$c = 15.6607(5) \text{ \AA}$                   | $a = 5.5484(2) \text{ \AA}$<br>$b = 5.6033(2) \text{ \AA}$<br>$c = 15.6688(5) \text{ \AA}$                   | $a = 5.5471(2) \text{ \AA}$<br>$b = 5.6011(2) \text{ \AA}$<br>$c = 15.6765(5) \text{ \AA}$                   | $a = 5.5448(2) \text{ \AA}$<br>$b = 5.5986(2) \text{ \AA}$<br>$c = 15.6819(5) \text{ \AA}$                   | $a = 5.5426(1) \text{ \AA}$<br>$b = 5.5952(1) \text{ \AA}$<br>$c = 15.6935(4) \text{ \AA}$                   | $a = 5.5411(1) \text{ \AA}$<br>$b = 5.5923(1) \text{ \AA}$<br>$c = 15.7055(3) \text{ \AA}$                   |
| Volume                     | 487.27(3) Å <sup>3</sup>                                                                                     | 487.14(3) Å <sup>3</sup>                                                                                     | 487.08(3) Å <sup>3</sup>                                                                                     | 486.83(3) Å <sup>3</sup>                                                                                     | 486.69(2) Å <sup>3</sup>                                                                                     | 486.68(2) Å <sup>3</sup>                                                                                     |
| Z                          | 8                                                                                                            | 8                                                                                                            | 8                                                                                                            | 8                                                                                                            | 8                                                                                                            | 8                                                                                                            |
| Density(calculated)        | 6.766 g cm <sup>-3</sup>                                                                                     | 6.753 g cm <sup>-3</sup>                                                                                     | 6.738 g cm <sup>-3</sup>                                                                                     | 6.724 g cm <sup>-3</sup>                                                                                     | 6.696 g cm <sup>-3</sup>                                                                                     | 6.665 g cm <sup>-3</sup>                                                                                     |
| R-factors <sup>a</sup>     | $R_{\text{wp}} = 0.0401$<br>$R_{\text{p}} = 0.0282$<br>$R_{\text{ex}} = 0.0165$<br>$R_{\text{F}}^2 = 0.1274$ | $R_{\text{wp}} = 0.0373$<br>$R_{\text{p}} = 0.0256$<br>$R_{\text{ex}} = 0.0160$<br>$R_{\text{F}}^2 = 0.1084$ | $R_{\text{wp}} = 0.0409$<br>$R_{\text{p}} = 0.0289$<br>$R_{\text{ex}} = 0.0166$<br>$R_{\text{F}}^2 = 0.1757$ | $R_{\text{wp}} = 0.0369$<br>$R_{\text{p}} = 0.0263$<br>$R_{\text{ex}} = 0.0163$<br>$R_{\text{F}}^2 = 0.1208$ | $R_{\text{wp}} = 0.0328$<br>$R_{\text{p}} = 0.0243$<br>$R_{\text{ex}} = 0.0164$<br>$R_{\text{F}}^2 = 0.1081$ | $R_{\text{wp}} = 0.0348$<br>$R_{\text{p}} = 0.0251$<br>$R_{\text{ex}} = 0.0595$<br>$R_{\text{F}}^2 = 0.1164$ |
| Total No. of variables     | 27                                                                                                           | 27                                                                                                           | 27                                                                                                           | 27                                                                                                           | 27                                                                                                           | 27                                                                                                           |
| No. of profile points used | 3460                                                                                                         | 3460                                                                                                         | 3460                                                                                                         | 3460                                                                                                         | 3460                                                                                                         | 3460                                                                                                         |

<sup>a</sup> For definition of R-factors see A. C. Larson and R. B. Von Dreele, *Los Alamos National Laboratory Report*, No. LAUR-86-748, 1987.
